# Supplementary material for: Network representations of attractors for change point detection
Source: Springer Nature journal article supplement (doi:10.1038/s42005-023-01463-y), 2023-11-25
Supplement: 42005_2023_1463_MOESM2_ESM.pdf [file 42005_2023_1463_MOESM2_ESM.pdf]

## Supplementary Information

Eugene Tan<sup>1\*</sup>, Shannon D. Algar<sup>1</sup>, Débora Corrêa<sup>2</sup>, Thomas Stemler<sup>1</sup> and Michael Small<sup>1,3</sup>

<sup>1</sup>The Complex Systems Group, Department of Mathematics & Statistics, The University of Western Australia, Crawley, Australia, 6009.

<sup>2</sup>Department of Computer Science & Software Engineering, The University of Western Australia, Crawley, Australia, 6009.

<sup>3</sup>Mineral Resources, CSIRO, Kensington, Australia, 6151.

\*Corresponding author(s). E-mail(s): [eugene.tan@uwa.edu.au](mailto:eugene.tan@uwa.edu.au);

Contributing authors: [shannon.algar@uwa.edu.au](mailto:shannon.algar@uwa.edu.au);

[debora.correa@uwa.edu.au](mailto:debora.correa@uwa.edu.au); [thomas.stemler@uwa.edu.au](mailto:thomas.stemler@uwa.edu.au);

[michael.small@uwa.edu.au](mailto:michael.small@uwa.edu.au);

### Supplementary Note 1: VF Detection with Comparison Methods

001  
002  
003  
004  
005  
006  
007  
008  
009  
010  
011  
012  
013  
014  
015  
016  
017  
018  
019  
020  
021  
022  
023  
024  
025  
026  
027  
028  
029  
030  
031  
032  
033  
034  
035  
036  
037  
038  
039  
040  
041  
042  
043  
044  
045  
046

2 *Supplementary Information*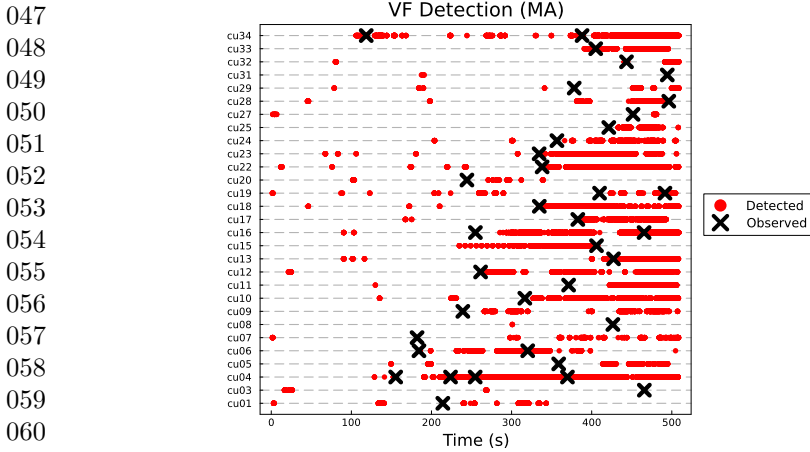

**Fig. S1** VF detection results using the moving average as the score for change point detection. Annotated onsets for VF are given black crosses, and flagged detection of VF is given by a red dot. The onset of VF is characterised by a persistent detection result (red).

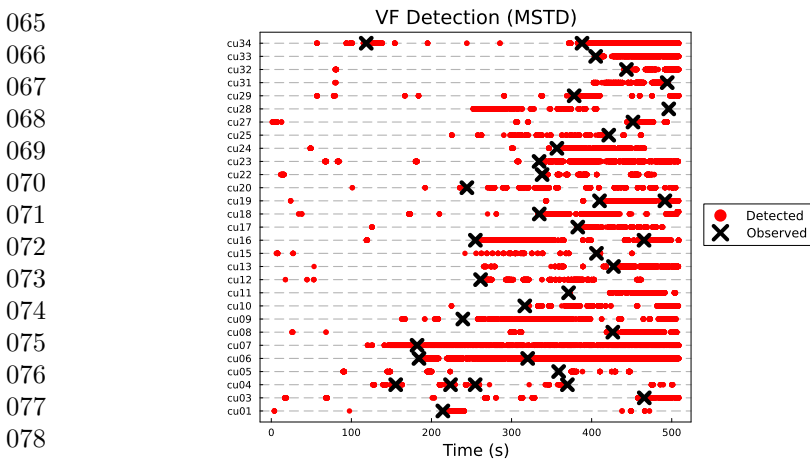

**Fig. S2** VF detection results using the moving standard deviation as the score for change point detection. Annotated onsets for VF are given black crosses, and flagged detection of VF is given by a red dot. The onset of VF is characterised by a persistent detection result (red).

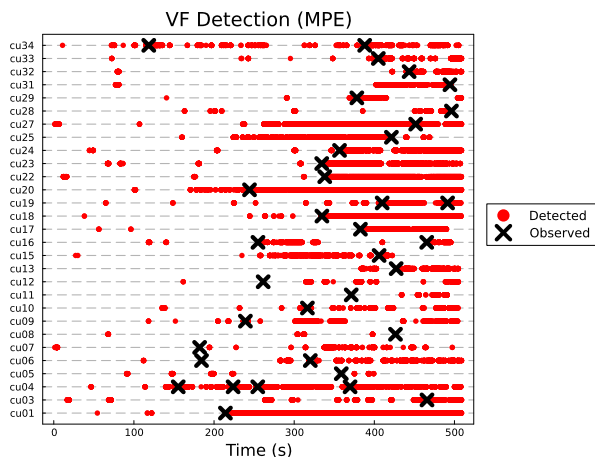

**Fig. S3** VF detection results using the moving permutation entropy as the score for change point detection. Annotated onsets for VF are given black crosses, and flagged detection of VF is given by a red dot. The onset of VF is characterised by a persistent detection result (red).

## Supplementary Note 2: Phase Coherence vs. Non-Phase Coherence Detection

Chaotic oscillators such as the Rössler system are distinct from periodic systems in that they do not exhibit an exact frequency [1]. Observation of the power spectrum of chaotic signals reveals activations across the whole band of considered frequencies. Phase coherence (PC) within a chaotic oscillator is characterised by the presence of a well defined peak on the power spectrum. An equivalent condition is that the phase of the signal changes monotonically where the phase can be approximated from the signal using a Hilbert transform [2]. This often corresponds to trajectories in phase space that rotate along a collection of orbits around some central point [1]. Parallel trajectories on these orbits have phases that are similar throughout the whole period of rotation. In contrast, non-phase coherent (NPC) systems do not have a clearly defined phase relationship over time.

The Rössler chaotic oscillator is one that exhibits both PC and NPC dynamics at different bifurcation values (see Fig. S5) [2] with system equations given by

$$\begin{aligned}\dot{x} &= -y - z, \\ \dot{y} &= x + \alpha y, \\ \dot{z} &= z(x - c),\end{aligned}$$

4 *Supplementary Information*

139  
 140  
 141  
 142  
 143  
 144  
 145  
 146  
 147  
 148  
 149  
 150  
 151  
 152  
 153  
 154  
 155  
 156  
 157  
 158  
 159  
 160  
 161  
 162  
 163  
 164  
 165  
 166  
 167  
 168  
 169  
 170  
 171  
 172  
 173  
 174  
 175  
 176  
 177  
 178  
 179  
 180  
 181  
 182  
 183  
 184

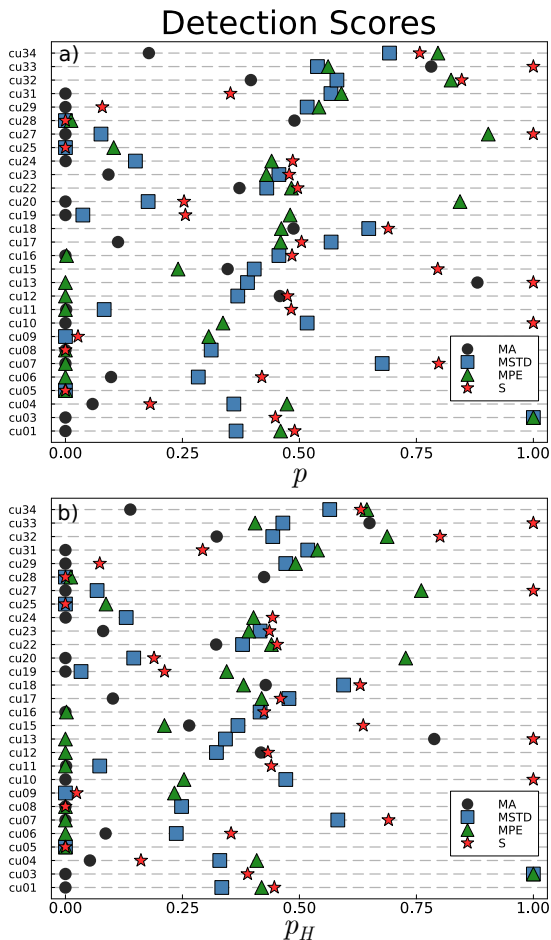

**Fig. S4** Detection performance scores for each patient compared across four methods: moving average (MA), moving standard deviation (MSTD), moving permutation entropy (MPE), and surprise (S). **(a)** raw performance score  $p$  and **(b)** performance score adjusted for successive detections.

where  $b = 0.4$  and  $c = 8.5$ . The phase coherence of the system can be controlled by the parameter  $\alpha = 0.165$  and  $\alpha = 0.265$  corresponding to the PC and NPC regimes respectively. This results in two similar attractors with structurally different features. From Figure S5 the PC attractor is close to a subset of the NPC regime. Hence, the attractor network approach that quantifies attractor changes would be able to detect changes from PC to NPC but not the reverse. This feature was used to test the attractor network approach in detecting changes in attractor structure in phase space.

Here, the change point detection task is to identify when the signal changes between the PC and NPC regime. To do this, an attractor network is trained on data generated from a Rössler system operating in the PC regime. An additional shorter length of training data of length 20000 was used to get



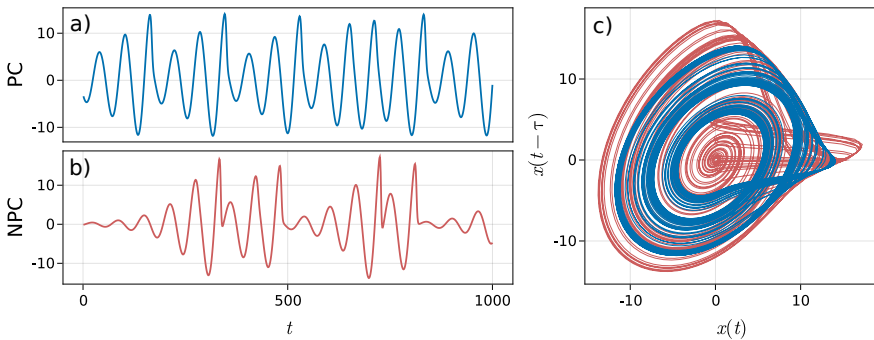

**Fig. S5** Time series of the Rössler system operating in the (a) PC ( $\alpha = 0.165$ ) (blue) and (b) NPC ( $\alpha = 0.265$ ) (red) regime. (c) The corresponding phase space reconstruction where the attractor for the PC system (blue) is almost a subset of the NPC attractor (red).

the 95% cutoff value for  $S(t)$  operating on the original system. The test data consisted of the simulated oscillator with a modulating bifurcation value  $\alpha$  switching between the PC  $\alpha = 0.165$  and NPC  $\alpha = 0.265$  regimes every 2000 steps. The resulting  $S(t)$  was used to evaluate  $E(t)$  and determine transition points.

The results revealed that the attractor network method performed equally well if not better than other simpler metrics (moving statistics, permutation entropy) in providing distinct cutoffs for the change points transitions between PC and NPC (see Fig. S6). However, we find that the converse problem of detecting PC transitions using attractor networks trained on NPC was not successful, whereas simpler metrics performed consistently. This difference in performance can be attributed to the fact that the PC Rössler attractor is spatially almost a subset of the NPC attractor (see Fig. S5) when discretised with respect to some selected resolution  $\epsilon$ . Whilst there exists differences between the state space distributions of both attractors,  $S(t)$  aims to capture the surprise of transition at a given point in time. Thus, such a method would be limited to the resolution governed by  $\delta$  and  $\epsilon$  as defined in the Methods section.

185  
186  
187  
188  
189  
190  
191  
192  
193  
194  
195  
196  
197  
198  
199  
200  
201  
202  
203  
204  
205  
206  
207  
208  
209  
210  
211  
212  
213  
214  
215  
216  
217  
218  
219  
220  
221  
222  
223  
224  
225  
226  
227  
228  
229  
230

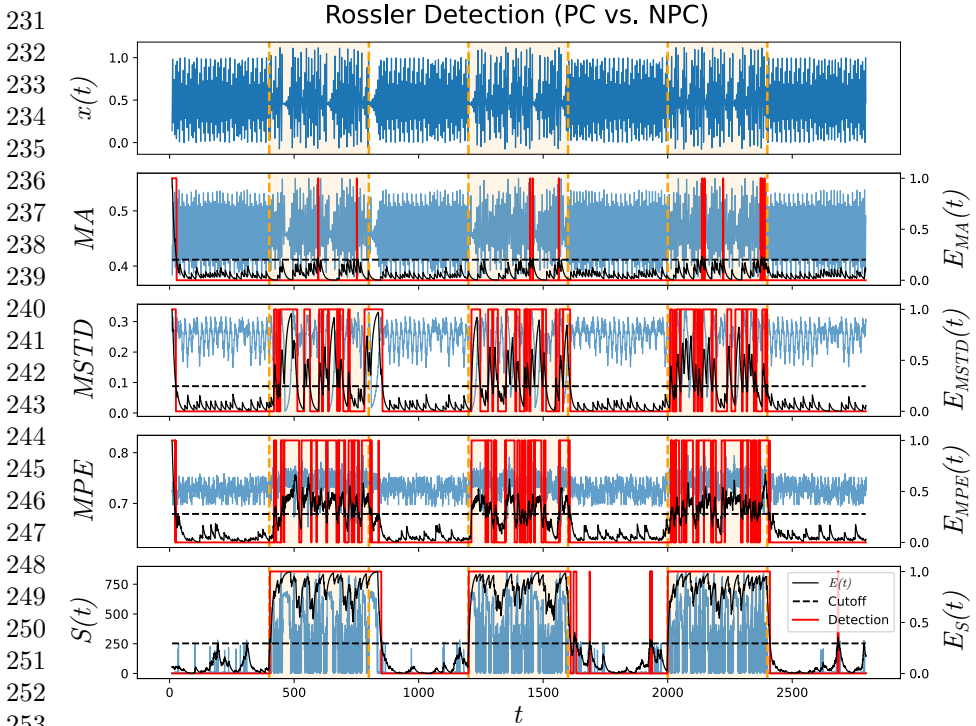

254 **Fig. S6** Results of all change point algorithms for detecting transitions between NPC and  
 255 PC Rössler time series. From the top to bottom: Original time series, moving average, moving  
 256 standard deviation statistic, moving permutation entropy, and surprise scores  $S(t)$ . Sliding  
 257 window lengths of 100 steps were used for calculating moving averages. Detections (red) are  
 258 made based on the exponential smoothed quantity  $E(t)$  with respect to a set cutoff  $E^*$ . Real  
 259 change points are given by vertical orange lines. All methods except the moving average  
 260 are able to detect change points. However, only the surprise score produces a persistent  
 classification of observations as abnormal.

## 261 **Supplementary Note 3: Quantifying Gradual** 262 **Transitions**

264 Contrasting with the detection of abrupt changes in the time series, the attractor  
 265 network approach was used to see if the surprise metric  $S(t)$  could be  
 266 used to quantify gradual changes in a system. To test this, we analyse the  
 267 Chua dynamical system that is known to contain two disjoint scroll-shaped  
 268 attractors,

$$\begin{aligned}
 270 \quad \dot{x} &= -(y - x + z), \\
 271 \quad \dot{y} &= -\alpha(x - y - f(y)), \\
 272 \quad \dot{z} &= \beta x + \gamma z, \\
 273 \quad f(y) &= ay^3 + by,
 \end{aligned}$$

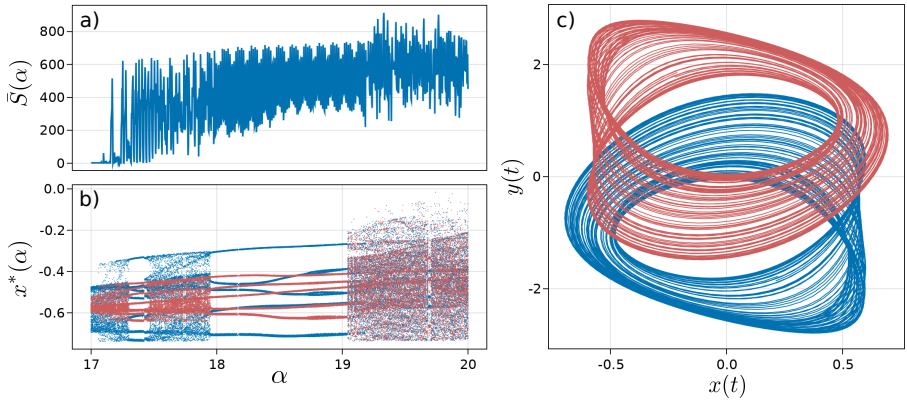

**Fig. S7** (a) The calculated average surprise for each 50 step window corresponding to a given value of  $\alpha$  with (b) containing the corresponding bifurcation diagram of the system. Blue and red represent the two disjoint scroll attractors which eventually merge at  $\alpha \approx 19.05$ . (c) The two disjoint scrolls attractors corresponding to the same bifurcation diagram at  $\alpha = 17$ .

where  $(\beta, \gamma, a, b) = (53.612186, -0.75087096, 0.03755, -0.84154)$ . For increasing values of  $\alpha \in (17, 20)$ , the system undergoes a gradual transition from the single scroll to double scroll regime [3]. During the transition, two disjoint scrolls in the Chua attractor gradually merge and undergo a crisis resulting in a single double scroll attractor. Input data from the single scroll Chua system ( $\alpha = 17$ ) with the  $dt = 0.1$  and 25000 time steps was used to construct the attractor network. To simulate the transition, the same Chua system was integrated in 1000 segments of 50 timesteps with each segment corresponding to a slight increase in  $\alpha$  in the interval  $[17, 20]$ . The endpoint of each segment is fed as initial conditions for the integration of the next interval to ensure continuity in the time series. Finally, the first component of the test time series is delay embedded and used for calculating  $S(t)$ .

The resulting profile showing average surprise for each window  $\bar{S}(\alpha)$  was found to correspond closely with the various regions in the bifurcation diagram (see Fig. S7). In the single scroll regime with two separate attractors ( $\alpha \approx [17, 17.95]$ ),  $\bar{S}(\alpha)$  shows relatively consistent volatile behaviour. The final double scroll regime  $\alpha \approx [19.05, 20]$  is also reflected in more disordered and larger amplitude variations. We also note that the periodic regimes ( $\alpha \approx [17.3, 17.4] \cup [17.95, 19.05]$ ) are also tracked well where  $\bar{S}(\alpha)$  displays a consistent pseudoperiodic behaviour. Additionally,  $\bar{S}(\alpha)$  shows a positive correlation with increasing deviation from the original trained value of  $\alpha = 17$ . The relatively gradual increase in surprise with increasing perturbation of the bifurcation parameter suggests that the attractor network may be sensitive in measuring the magnitude of change in a given system.

277  
278  
279  
280  
281  
282  
283  
284  
285  
286  
287  
288  
289  
290  
291  
292  
293  
294  
295  
296  
297  
298  
299  
300  
301  
302  
303  
304  
305  
306  
307  
308  
309  
310  
311  
312  
313  
314  
315  
316  
317  
318  
319  
320  
321  
322

323  
 324  
 325  
 326  
 327  
 328  
 329  
 330  
 331  
 332  
 333  
 334  
 335  
 336  
 337  
 338  
 339  
 340  
 341  
 342  
 343  
 344  
 345  
 346  
 347  
 348  
 349  
 350  
 351  
 352  
 353  
 354  
 355  
 356  
 357  
 358  
 359  
 360  
 361  
 362  
 363  
 364  
 365  
 366  
 367  
 368

## Supplementary Note 4: Nonlinear Change Point Detection

In this section, we provide additional comparisons between the attractor network approach and two nonlinear time series analysis methods from recurrence quantification analysis. Recurrence quantification analysis is a method that aims to track spatial recurrences of a given trajectory in phase space [4]. Given a multivariate time series  $\vec{x}(t) \in \mathbb{R}^m$  of length  $L$ , a recurrence matrix  $R$  is a  $L \times L$  square matrix with entries given by

$$R_{ij} = \begin{cases} 1 & , \|\vec{x}(i) - \vec{x}(j)\| < \epsilon \\ 0 & , \text{otherwise} \end{cases}, \quad (\text{S1})$$

where  $\epsilon$  is a size scale parameter typically selected such that a proportion  $r$  of the entries in  $L$  are non-zero. The constant  $r$  is commonly termed the recurrence rate.

Broadly speaking, a dynamical system's trajectories may be partially represented by the observed recurrences of its trajectories. Recurrence quantification analysis (RQA) aims to identify measures and properties from  $R$  for the purpose of time series analysis. In the context of change point detection, we compare the attractor network approach with two recent RQA-based methods: quadrant scan (QS) and modularity scan (MOD). For the interested reader, we refer to the work by [5] and [6] for further detail on these methods.

We employ a sliding window approach of length 100 and calculate both QS and MOD measures alongside moving average, moving standard deviation, permutation entropy and surprise for change point detection in two cases: (1) Chua AAFS and (2) Rössler PC vs. NPC. The results are provided in Figures S8 and S9.

The recurrence plot measures, QS and MOD, performed similarly and were able to detect change points effectively in both test cases. These measures are only defined across the length of a target sliding window. As they are unsupervised methods, quadrant and modularity scan are only able to detect the transitions between normal and unhealthy (and vice versa). Regardless, we find that both nonlinear methods perform similarly to the attractor network approach and outperform moving statistics measures when detecting the onset of regime changes. This result is unsurprising as both approaches, attractor networks and RQA, track changes in the vector field in phase space. In the former, this is achieved by evaluating transition probabilities between discretised regions, whereas the latter uses the frequency of recurrences.

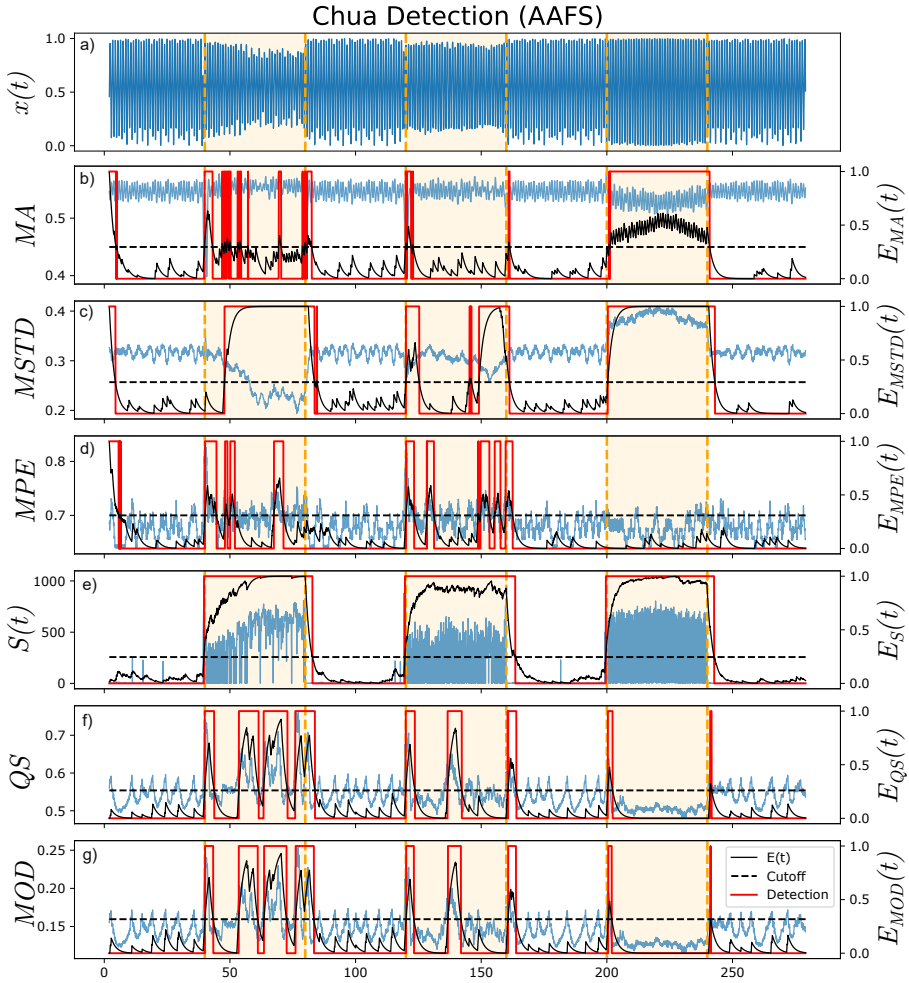

**Fig. S8** Change point detection for differentiating between Chua single scroll dynamics and amplitude adjusted Fourier surrogates. Shown: (a) original time series, detection results for (b) moving average, (c) moving standard deviation, (d) permutation entropy, (e) surprise, (f) quadrant scan (QS) and (g) modularity scan (MOD).

## References

- [1] Zou, Y., Donner, R.V., Wickramasinghe, M., Kiss, I.Z., Small, M., Kurths, J.: Phase coherence and attractor geometry of chaotic electrochemical oscillators. *Chaos* **22**(3), 033130 (2012)
- [2] Zou, Y., Donner, R.V., Kurths, J.: Geometric and dynamic perspectives on phase-coherent and noncoherent chaos. *Chaos* **22**(1), 013115 (2012)
- [3] Kengne, J.: On the dynamics of Chua's oscillator with a smooth cubic nonlinearity: Occurrence of multiple attractors. *Nonlinear Dynamics* **87**(1), 414

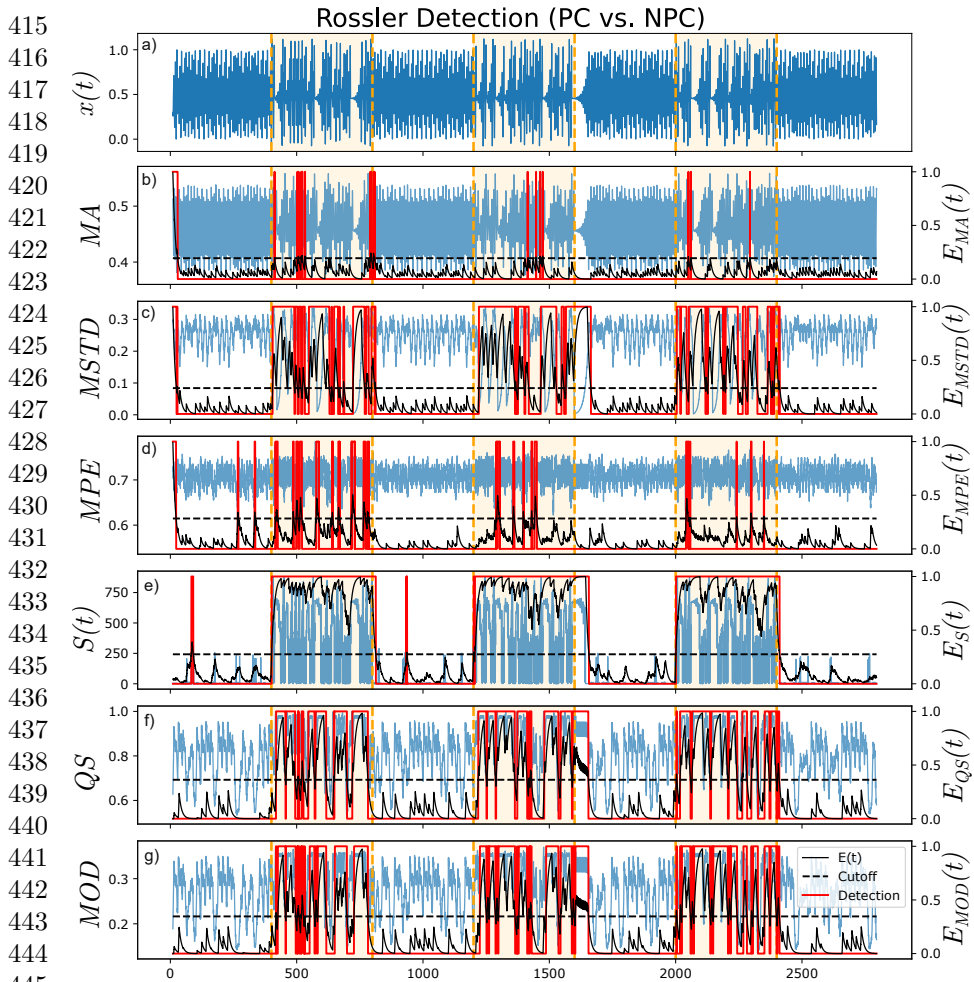

446 **Fig. S9** Change point detection for differentiating between PC and NPC Rössler. Shown:  
 447 (a) original time series, detection results for (b) moving average, (c) moving standard deviation,  
 448 (d) permutation entropy, (e) surprise, (f) quadrant scan (QS) and (g) modularity scan  
 449 (MOD).

450 363–375 (2017)

451

452 [4] Marwan, N., Romano, M.C., Thiel, M., Kurths, J.: Recurrence plots for the  
 453 analysis of complex systems. *Physics Reports* **438**(5-6), 237–329 (2007)

454

455 [5] Rapp, P.E., Darmon, D.M., Cellucci, C.J.: Hierarchical transition  
 456 chronometries in the human central nervous system. In: *Proceedings from  
 457 the International Conference on Nonlinear Theory and Applications* (2013)

458

459 [6] Goswami, B.: A brief introduction to nonlinear time series analysis and  
 460 recurrence plots. *Vibration* **2**(4), 332–368 (2019)
